# Supplementary material
Source: HighWire-hosted journal article supplement (https://rapm.bmj.com/content/rapm-2024-105651)
Supplement: inline-supplementary-material-2 [file inline-supplementary-material-2.pdf]

## Abbreviations

ACDF = anterior cervical discectomy and fusion  
ACR/AAHKS = American College of Rheumatology/American Association of Hip and Knee Surgeons  
ACS NSQIP = American College of Surgeons National Surgical Quality Improvement Project  
ASA = American Society of Anesthesiologists  
ASRA = American Society of Regional Anesthesia and Pain Medicine  
AWA = anesthesia work area  
BMI = Body mass index  
CDC = Centers for Disease Control and Prevention  
cDMARD = conventional disease-modifying antirheumatic drug  
CI = confidence interval  
CNS = central nervous system  
CESI = cervical epidural corticosteroid injection  
CoNS = coagulase-negative staphylococci  
CFU = colony-forming unit  
CPPS = colony per surface sampled  
CRP = C-reactive protein  
CT = computed tomography [imaging]  
CVC = central venous catheter  
DBPC = double-blind placebo controlled  
DMARD = disease-modifying antirheumatic drug  
ESI = epidural [cortico]steroid injection  
ESR = erythrocyte sedimentation rate  
FDA = [United States] Food and Drug Administration  
HAI = healthcare-associated infection  
HEPA = high efficiency particulate air [filter]  
HIV = human immunodeficiency virus  
IACS = intra-articular corticosteroid  
ICU = intensive care unit  
IDD = intrathecal drug delivery  
JAK = Janus kinase [inhibitors]  
MRSA = methicillin-resistant *S aureus*  
MSSA = methicillin-susceptible *S aureus*  
NACC = Neuromodulation Appropriateness Consensus Committee  
NICE = National Institute for Health and Care Excellence  
OR = odds ratio  
PCF = posterior cervical fusion  
PJI = prosthetic joint infection  
PNB = peripheral nerve block  
PPE = personal protective equipment  
PRP = platelet-rich plasma  
RCT = randomized controlled trial  
RFA = radiofrequency ablation  
SCIP = Surgical Care Improvement Project  
SCS = spinal cord stimulation  
SEA = spinal epidural abscess  
SHEA/IDSA/APIC = Society for Healthcare Epidemiology/Infectious Disease Society of America/Association for Professionals in Infection Control and Epidemiology

SIJ = sacroiliac joint injection  
SLE = systemic lupus erythematosus  
SSI = surgical site infection  
TB = tuberculosis  
THA = total hip arthroplasty  
TKA = total knee arthroplasty  
TKR = total knee replacement  
TNF = tumor necrosis factor  
TPI = trigger point injection  
USPSTF = US Preventive Services Task Force  
WHO = World Health Organization
